# Supplementary material for: Uncovering shared genetic features between inflammatory bowel disease and systemic lupus erythematosus
Source: Research Square preprint supplement (doi:10.21203/rs.3.rs-5804830/v1), 2025-03-28
Supplement: Supplementary file 1 [file 3bb8fc4cca88c805ffd719ca.xlsx]

## Sheet: Sheet1
Supplementary Table S1. SNP-based heritability estimate from LDSR
Disease	h2_obs	h2_obs_se
IBD	0.3157	0.0305
CD	0.4497	0.0501
UC	0.2372	0.0262
SLE	0.2413	0.041
