# Supplementary material for: Uncovering shared genetic features between inflammatory bowel disease and systemic lupus erythematosus
Source: Research Square preprint supplement (doi:10.21203/rs.3.rs-5804830/v1), 2025-03-28
Supplement: Supplementary file 2 [file 8525a3eb2301d8934c17d3fc.xlsx]

## Sheet: Sheet1
Supplementary Table S2. Gene-level association test model definitions
Definitions available here	https://azphewas.com/modelDefinitions
Model	Definition
flexdmg	Non-synonymous (including protein-truncating variants, missense variants, in-frame insertions and deletions, splice acceptor variants and splice donor variants); Predicted to be damaging (REVEL score ≥ 0.25); Moderately rare (minor allele frequency ≤ 0.001 within the cohort and within gnomAD)
flexnonsyn	Non-synonymous; Moderately rare (minor allele frequency ≤ 0.001 within the cohort and within gnomAD)
flexnonsynmtr	Non-synonymous; Moderately rare (minor allele frequency ≤ 0.001 within the cohort and within gnomAD); Missense variants must fall within a constrained region (MTR < 0.78 or MTR_centile < 0.5)
ptv	Protein-truncating variant; Moderately rare (minor allele frequency ≤ 0.001 within the cohort and within gnomAD)
ptv5pcnt	Protein-truncating variant; Less common (minor allele frequency ≤ 0.05 within the cohort and within gnomAD)
ptvraredmg	Non-synonymous; Predicted to be damaging (REVEL score ≥ 0.25); PTVs must be moderately rare (minor allele frequency ≤ 0.001 within the cohort and within gnomAD); Non-PTVs must be rare (minor allele frequency ≤ 0.0005 within the cohort and within gnomAD)
raredmg	Missense variants; Predicted to be damaging (REVEL score ≥ 0.25); Rare (minor allele frequency ≤ 0.0005 within the cohort and within gnomAD)
raredmgmtr	Missense variants; Predicted to be damaging (REVEL score ≥ 0.25); Rare (minor allele frequency ≤ 0.0005 within the cohort and within gnomAD); Missense variants must fall within a constrained region (MTR < 0.78 or MTR_centile < 0.5)
rec	Non-synonymous; Slightly rare (minor allele frequency ≤ 0.005 within the cohort and within gnomAD); Variant must either be homozygous, or there must be two or more such qualifying variants in the gene in the individual
syn	Synonymous; Rare (minor allele frequency ≤ 0.0005 within the cohort and within gnomAD)
UR	Non-synonymous; Predicted to be damaging (REVEL score ≥ 0.25); Ultra-rare (minor allele frequency ≤ 0.00025 within the cohort and absent from gnomAD)
Urmtr	Non-synonymous; Predicted to be damaging (REVEL score ≥ 0.25); Ultra-rare (minor allele frequency ≤ 0.00025 within the cohort and absent from gnomAD); Missense variants must fall within a constrained region (MTR < 0.78 or MTR_centile < 0.5)
