# Supplementary material for: Uncovering shared genetic features between inflammatory bowel disease and systemic lupus erythematosus
Source: Research Square preprint supplement (doi:10.21203/rs.3.rs-5804830/v1), 2025-03-28
Supplement: Supplementary file 3 [file d46b12b5d171b6a35243a446.xlsx]

## Sheet: CD_SLE
Supplementary Table S3A. Local genetic correlation analysis results for CD-SLE comparisons.
chr	start	end	rho	corr	h2_1	h2_2	var	p	m
1	93352491	94451007	-0.000607671	-1.0621	0.000680765	0.000480846	4.45133e-08	0.00397418	312
1	112561693	114451307	-0.00149389	-0.938972	0.0015797	0.00160235	3.54086e-07	0.0120553	661
2	1159982	1681720	-0.000438762	-1.03943	0.000186982	0.00095294	4.09381e-08	0.0301185	214
2	26894589	28597305	0.000564693	1.10409	0.000911274	0.000287055	6.68065e-08	0.0289067	469
2	66375016	67978287	-0.00100078	-1.57443	0.00171215	0.000235985	1.45756e-07	0.00875838	769
2	102688495	103262415	0.000708701	0.706763	0.00219196	0.000458718	1.23566e-07	0.0437885	347
2	147255216	149268931	0.000548174	1.30963	0.000800443	0.000218881	6.65297e-08	0.0335654	466
2	161078891	163358537	-0.000614517	-1.78637	0.000425152	0.000278345	8.54975e-08	0.0355853	647
2	198141746	200498970	-0.000993325	-1.17193	0.00189573	0.000378972	8.98819e-08	0.000922157	583
3	149994553	151178708	0.000529437	1.77204	0.000274485	0.000325207	6.89832e-08	0.0438233	458
4	1478711	3612028	0.00083371	0.684479	0.000979954	0.00151392	1.12418e-07	0.012899	609
4	68456074	69954151	0.000339876	1.41881	0.000156036	0.000367763	2.45732e-08	0.0301474	264
4	94230511	95596188	0.000701166	1.32659	0.000494884	0.000564504	5.34498e-08	0.00242273	482
4	108469756	109979131	0.000829702	2.24651	0.000298744	0.000456592	6.5273e-08	0.00116405	560
5	10666804	11170506	0.000566763		0.000745138	-8.01974e-05	5.78636e-08	0.0184666	314
5	95822732	96867936	0.00107655	1.15765	0.0027497	0.000314508	7.95529e-08	0.000135153	452
5	106800765	108633176	0.000775634	0.861726	0.0005178	0.00156464	1.45349e-07	0.0419042	731
6	125336799	128759251	-0.000825276	-0.60051	0.00198903	0.000949551	1.44702e-07	0.0300436	873
6	156761338	157398853	0.00041284	1.60168	0.000384764	0.000172669	3.68918e-08	0.031603	241
6	167178790	168548525	0.00196109	0.87709	0.00687745	0.00072691	2.4988e-07	8.74059e-05	598
7	28039590	28710596	0.000977336	1.03567	0.000888731	0.00100201	1.45118e-07	0.0103008	371
7	34940039	35614036	0.000457025	0.98078	0.00029445	0.000737437	5.23601e-08	0.0457946	288
7	54707337	55641707	-0.000683675	-2.02327	0.000335591	0.000340236	6.70172e-08	0.00826796	433
8	1625732	2042364	-0.000597031	-0.887827	0.000315834	0.00143179	8.22543e-08	0.0373702	294
8	41719750	42501174	0.000344838	1.10093	0.000730282	0.000134346	2.37836e-08	0.0253501	180
8	59570176	61809929	0.000638817	0.894172	0.000532618	0.000958285	1.06201e-07	0.0499661	744
8	69111244	70003448	0.000594726	2.60142	0.000466172	0.000112116	7.04225e-08	0.0250196	395
8	118623844	120216957	0.00090014	0.976465	0.00074203	0.00114521	1.29973e-07	0.0125322	699
8	130814803	131553214	0.000440792	1.47957	0.00027093	0.000327597	4.02909e-08	0.0280927	278
9	4591655	5273194	0.00115627	1.00806	0.00479389	0.000274451	1.63887e-07	0.00428749	331
9	138817178	141146684	-0.00147768	-0.760923	0.00728454	0.000517696	2.07794e-07	0.00118851	679
10	5359010	6316910	0.00127068	1.24931	0.00182407	0.000567142	1.39883e-07	0.000680143	589
10	33656119	36017592	0.00241145	0.779657	0.00447161	0.00213937	1.74121e-07	7.51412e-09	805
10	49816189	50839403	0.000879553	0.612195	0.000731417	0.00282215	1.18075e-07	0.0104773	536
10	118417453	119697663	0.000956135	1.76532	0.000388421	0.000755249	1.20014e-07	0.00578075	588
11	11361458	12018942	-0.000656456	-1.33673	0.000154223	0.00156377	8.94748e-08	0.0281923	481
11	34321876	35034307	-0.000477031	-0.782461	0.000208396	0.00178352	5.39129e-08	0.03993	427
11	130894131	131870763	0.000985711	1.09817	0.0010485	0.000768407	1.21403e-07	0.0046692	657
12	8658644	10477423	0.000398491	10.4949	0.000195381	7.37897e-06	3.71294e-08	0.0386358	251
12	12533494	13362446	-0.000593074	-1.00951	0.000618488	0.000558045	6.31395e-08	0.0182626	367
12	57535266	58748272	0.000633361	1.6015	0.000583576	0.000268009	4.86073e-08	0.00406894	380
12	67818111	68740414	-0.000764873	-0.9408	0.00114184	0.000578865	1.25364e-07	0.0307537	499
12	102961450	104011319	-0.000568895	-1.2564	0.000239891	0.000854665	7.86763e-08	0.0425401	418
13	40181792	41773356	0.000666662	1.70435	0.00141536	0.000108101	9.20085e-08	0.027962	618
13	41774489	43099692	0.000980028	0.867258	0.00236871	0.000539099	1.95852e-07	0.0267948	536
13	48440893	49987145	0.000487266	1.166	0.000355992	0.000490558	4.72415e-08	0.024972	441
13	104065534	104842764	0.000517905	1.09071	0.000726511	0.000310342	5.90897e-08	0.0331253	351
14	96251418	97570260	0.00115638	1.28805	0.00116458	0.000692091	1.14083e-07	0.000617871	635
14	97571437	98987472	0.000687494	0.511175	0.000679782	0.0026609	1.15648e-07	0.0432153	629
14	102341650	104759919	0.000961325	0.966724	0.0008493	0.00116433	1.3922e-07	0.00998249	683
15	22362658	23288776	0.000407782		0.000490937	-2.47896e-05	2.99014e-08	0.0183633	143
15	43474655	44988610	0.000313231	1.45905	5.6628e-05	0.000813874	2.28519e-08	0.0382593	247
15	47979127	49075918	0.000527625	1.69801	0.000209975	0.000459835	5.14355e-08	0.0199945	343
15	49078966	50004817	0.000338525	1.57174	0.000241632	0.000191985	2.7591e-08	0.0415485	250
15	76397390	77910873	0.000690418	1.38985	0.000711755	0.000346701	5.93903e-08	0.00461062	417
15	87693885	88032107	0.0003247	1.71454	0.000212389	0.000168863	2.49393e-08	0.0397749	155
15	95577096	96497729	-0.000590684	-1.07996	0.000381349	0.000784455	8.61361e-08	0.0441544	410
16	11612436	12151685	0.00066288	0.927854	0.00130161	0.00039213	7.23268e-08	0.0137082	182
16	50698071	51700822	-0.00246962	-1.67309	0.0169366	0.000128645	7.35668e-07	0.00398544	447
16	56908045	57663112	0.000846789	0.71401	0.000708968	0.00198388	9.94558e-08	0.00725083	334
17	37344586	38649203	0.00156249	0.894656	0.00243217	0.00125409	2.80172e-07	0.00315812	313
18	6630840	7373590	0.000676121	1.37208	0.000207951	0.00116769	7.33268e-08	0.0125301	389
18	11530996	12737037	0.000898081	1.29373	0.000548515	0.000878524	6.44974e-08	0.000405834	449
18	39892281	42606024	0.001094	1.25241	0.000688163	0.00110881	1.51449e-07	0.00493631	920
18	61441801	62075853	0.000362528	1.43784	0.000308829	0.000205848	3.12712e-08	0.0403572	273
19	759261	1089241	-0.00148328	-1.06489	0.000983977	0.00197175	1.05195e-07	4.80203e-06	146
19	32145233	33763475	0.000860404	1.11985	0.000848569	0.000695659	1.55136e-07	0.0289277	582
19	48697961	49485758	-0.00155549	-0.859383	0.00182672	0.00179345	1.57579e-07	8.91068e-05	319
19	49925208	50774141	-0.000707803	-1.20894	0.000496535	0.000690341	1.25291e-07	0.0455386	241
21	45603905	46174491	-0.000620963	-0.760721	0.00281178	0.000236974	9.43025e-08	0.0431651	269
21	46741287	47491264	0.00070689	1.20639	0.000482518	0.000711563	6.519e-08	0.00562965	328
22	21866569	23015302	0.00287439	0.992395	0.00229447	0.00365627	4.12304e-07	7.58853e-06	282
22	39304509	40092866	0.000953552	0.52964	0.00240971	0.00134512	2.05304e-07	0.0353364	310

## Sheet: UC_SLE
Supplementary Table S3B. Local genetic correlation analysis results for CD-SLE comparisons.
chr	start	end	rho	corr	h2_1	h2_2	var	p	m
1	1103150	2320702	-0.00074754	-0.561903	0.00160918	0.00109987	1.06747e-07	0.0221376	319
1	2321099	3065568	0.00094725	0.963164	0.00234019	0.000413312	7.29945e-08	0.000454788	231
1	6134990	7245669	-0.000578586	-1.14054	0.000279456	0.000920873	8.4074e-08	0.0459959	421
1	205459511	206705609	0.00113754	1.1837	0.00139231	0.000663311	1.42051e-07	0.00254294	327
2	1159982	1681720	-0.000438269	-0.951419	0.000222676	0.00095294	3.29676e-08	0.0157881	214
2	60449710	62420656	0.00100716	1.08448	0.00304378	0.000283362	1.46798e-07	0.00857132	637
2	101338644	102688272	0.000595744	0.797485	0.000900599	0.000619644	7.16432e-08	0.0260325	517
2	102688495	103262415	0.000424813	0.928183	0.000456669	0.000458698	4.2787e-08	0.0400024	347
2	145303576	147252762	0.000539036	0.888768	0.000624274	0.000589227	6.44177e-08	0.0336863	499
2	147255216	149268931	0.000466753	1.18397	0.000709705	0.000218983	5.14356e-08	0.0395859	466
2	155209736	156568446	-0.000500429	-1.42842	0.000209164	0.000586791	6.05451e-08	0.0419745	439
3	30717661	31720982	0.000493769	1.99918	0.000221256	0.000275708	4.45756e-08	0.0193509	404
3	98300731	100591006	-0.000592511	-0.89246	0.000299153	0.00147341	9.04728e-08	0.0488533	738
3	120521733	121335461	0.000267347	1.85581	8.55019e-05	0.000242722	1.69992e-08	0.0403148	208
3	195855401	196414159	-0.000489293	-1.70608	0.000505712	0.000162644	4.80906e-08	0.0256677	193
4	5971634	7135912	0.000817165	1.25079	0.000463274	0.000921319	1.0356e-07	0.0111073	578
4	94230511	95596188	0.000483523	1.49359	0.000185564	0.000564777	4.3671e-08	0.0206801	482
4	106482185	108468632	0.000440209	1.63889	0.00039353	0.000183331	4.60502e-08	0.0402314	615
4	108469756	109979131	-0.000762262	-1.35087	0.000697478	0.000456508	5.39338e-08	0.00102976	560
5	10056	1267356	0.000729686	3.13271	0.00219822	2.46808e-05	8.77514e-08	0.0137682	396
5	65910316	67096208	0.000502743	1.79583	0.000176899	0.000443034	6.4157e-08	0.0471629	505
5	158492279	159135376	-0.000863951	-0.999922	0.00269719	0.00027678	1.90561e-07	0.0478025	270
6	40345542	42105449	0.000683075	1.02787	0.000773801	0.000570725	1.1353e-07	0.0426338	858
6	89673861	91400644	-0.000901122	-1.43802	0.000426284	0.000921161	1.12789e-07	0.00729246	787
6	163277858	164003180	0.000567224		-6.54261e-05	0.000619843	5.34731e-08	0.0141694	368
6	167178790	168548525	0.000799909	0.863338	0.00118097	0.00072691	1.09712e-07	0.0157363	598
7	49822437	51674880	-0.00089967	-1.27693	0.000418326	0.00118664	1.43532e-07	0.0175632	754
7	105427565	106052506	-0.000537919	-1.99121	0.00029011	0.000251557	5.32996e-08	0.0198065	310
7	128555262	130074230	0.0013426	0.651	0.000471023	0.00903007	3.41706e-07	0.0216307	535
8	6352358	7793703	-0.000562876	-0.739434	0.000829936	0.000698205	7.51826e-08	0.0400885	469
8	116095815	117130004	0.000379051	1.09781	0.00073992	0.000161123	2.76974e-08	0.0227501	266
9	4591655	5273194	0.00106707	1.0235	0.0039605	0.000274451	1.15083e-07	0.00165813	331
9	101474837	103543692	0.000557311	2.59191	0.0003347	0.000138134	6.62055e-08	0.0303141	659
9	138817178	141146684	-0.000933646	-0.721847	0.00323245	0.000517539	1.39733e-07	0.0125018	679
10	30654528	31479103	-0.000519095	-1.81256	0.000544146	0.000150728	5.2854e-08	0.0239507	424
10	33656119	36017592	0.00115948	0.804377	0.000971243	0.00213934	9.37856e-08	0.000153014	805
10	47768664	49812917	0.000438386	1.10826	0.000819129	0.000191019	4.69108e-08	0.0429658	341
10	50840736	52086621	-0.000421746	-1.12742	0.000239378	0.000584589	2.95002e-08	0.0140692	202
10	104208761	106139081	0.000514053	1.30656	0.000450827	0.000343361	6.20044e-08	0.0389784	671
10	107875182	109577686	-0.000627413	-3.47284	0.000208949	0.000156206	9.12177e-08	0.0377673	710
10	118417453	119697663	0.00110775	1.77224	0.000517307	0.000755249	9.13372e-08	0.000246979	588
11	333347	1057948	-0.000426075	-0.346183	0.000413701	0.00366164	4.60651e-08	0.0471241	307
11	1058583	1861912	0.000449216		0.000609435	-5.09583e-05	4.66431e-08	0.0375264	300
11	16790799	18788126	0.000643129	0.954438	0.000856545	0.000530091	1.05365e-07	0.0475581	883
11	18789820	20113591	-0.000691024		0.000222694	-0.000362887	1.16797e-07	0.0431781	768
11	35036029	36117340	0.000994376	0.774218	0.000508903	0.00324145	1.20025e-07	0.00410195	577
11	68521072	69508567	0.000530608	1.29525	0.000315312	0.000532233	5.34829e-08	0.0217686	382
11	76432156	77903706	-0.000466735	-1.32903	0.000224783	0.000548664	4.68424e-08	0.0310443	524
11	110702636	111981853	0.000735112	1.22381	0.000335541	0.0010753	4.56327e-08	0.000579046	453
12	67818111	68740414	-0.0012075	-0.952413	0.00277683	0.000578861	3.33455e-07	0.0365218	499
12	117087697	117644288	0.000289694	3.36545	4.83578e-05	0.000153223	2.10057e-08	0.0456297	180
12	126463562	127382559	0.000569748	1.40097	0.000222753	0.000742482	6.57359e-08	0.0262703	505
13	37029009	38290705	0.000628199	2.9147	0.000399852	0.000116173	6.78315e-08	0.0158643	596
15	41212265	42222063	-0.000510455	-1.11654	0.000900306	0.000232154	4.3193e-08	0.0140444	288
15	88743108	89561223	0.000755132	1.10308	0.00053959	0.000868499	7.33263e-08	0.00529295	322
16	12775897	13119544	-0.00040381	-1.67067	0.000229593	0.000254456	2.83231e-08	0.0164211	134
16	55506137	56906006	0.000586215	1.29186	0.000248904	0.000827277	8.56007e-08	0.0451093	582
16	56908045	57663112	0.00084032	1.03109	0.000334815	0.00198376	7.49624e-08	0.00214645	334
17	4322053	4650487	0.000596533		0.000601003	-2.94058e-05	4.50575e-08	0.00494971	169
17	21285166	25677370	-0.000375726	-0.998775	0.000280834	0.000503915	2.8208e-08	0.0252801	200
17	25679294	26272308	-0.000404842	-1.37413	0.000765605	0.000113373	3.10974e-08	0.0216906	198
17	26273607	27884779	-0.000539063	-1.93706	0.000201163	0.000384988	5.2965e-08	0.0191645	432
17	35731855	37341235	-0.000788114	-1.0583	0.000361359	0.00153469	1.19815e-07	0.0227954	487
17	37344586	38649203	0.00118944	0.848704	0.00156615	0.00125412	2.27518e-07	0.0126439	313
18	32457437	33791804	0.0004687	1.60369	0.000235882	0.000362121	5.22271e-08	0.0402753	471
19	759261	1089241	-0.000655725	-0.800058	0.000340683	0.00197175	6.92392e-08	0.0127031	146
19	2816339	3301333	0.000514523	3.45891	0.000151379	0.000146172	4.79769e-08	0.0188224	199
20	30574455	31613985	-0.000363468	-1.34609	0.00067519	0.000107984	3.43652e-08	0.0499162	328
20	48081983	48655016	0.000342296	0.937404	0.00034898	0.000382077	2.95619e-08	0.0464985	224
21	40116044	41095241	0.000782225		0.00230632	-0.00024111	1.31529e-07	0.0310171	593
21	45603905	46174491	-0.000577618	-0.882182	0.0018091	0.000236974	5.16035e-08	0.0109989	269
22	21866569	23015302	0.00162627	1.07617	0.000624574	0.00365627	1.52304e-07	3.0845e-05	282
